# Supplementary material
Source: PubMed Central journal article supplement (PMC6156893)
Supplement: ba014977-suppl1.pdf [file ba014977-suppl1.pdf]

**Supplemental Methods:****Table S1. Flow cytometry antibodies used in the experiments**

| <b>Antigen</b>     | <b>Fluorochrome</b> | <b>Clone</b> | <b>Vendor</b>            |
|--------------------|---------------------|--------------|--------------------------|
| B220/CD45R         | PE-Cy7              | RA3-6B2      | BD Biosciences           |
|                    | BV 785              | RA3-6B2      | Biolegend                |
| c-Kit (CD117)      | BV 650              | ACK2         | Biolegend                |
| CD11b              | APC-Cy7             | M1/70        | Biolegend                |
|                    | PE-Cy7              | M1/70        | Biolegend                |
| CD127              | BV 421              | A7R34        | Biolegend                |
| CD19               | AlexaFluor 700      | 6D5          | Biolegend                |
|                    | APC                 | 6D5          | Biolegend                |
| CD25               | BV421               | PC61         | Biolegend                |
| CD3                | APC-Cy7             | 17A2         | Biolegend                |
|                    | PE-Cy7              | 17A2         | Biolegend                |
| CD31               | BV421               | 390          | BD Biosciences           |
| CD4                | V500                | RM4-5        | BD Biosciences           |
|                    | PE-Cy7              | GK1.5        | Biolegend                |
| CD43               | PE                  | 1B11         | Biolegend                |
| CD45               | APC-Cy7             | 30-F11       | Biolegend                |
|                    | APC                 | 30-F11       | Biolegend                |
| CD51               | PE                  | RMV-7        | Biolegend                |
| CD8                | PE-Cy7              | 53-6.7       | Biolegend                |
| Flt3 (CD135)       | PE                  | A2F10        | Biolegend                |
| Gr-1 (Ly-6G/Ly-6C) | PE-Cy7              | RB6-8C5      | Biolegend                |
|                    | APC-Cy7             | RB6-8C5      | Biolegend                |
| H-2Kb              | PE-Cy7              | AF6-88.5.5.3 | ThermoFisher/eBioscience |
| IgM                | BV 421              | RMM-1        | Biolegend                |
| Ly-6D              | FITC                | 49-H4        | Biolegend                |
| Sca-1              | APC                 | D7           | ThermoFisher/eBioscience |
| TER-119            | APC-Cy7             | TER-119      | Biolegend                |

Supplemental Figures:

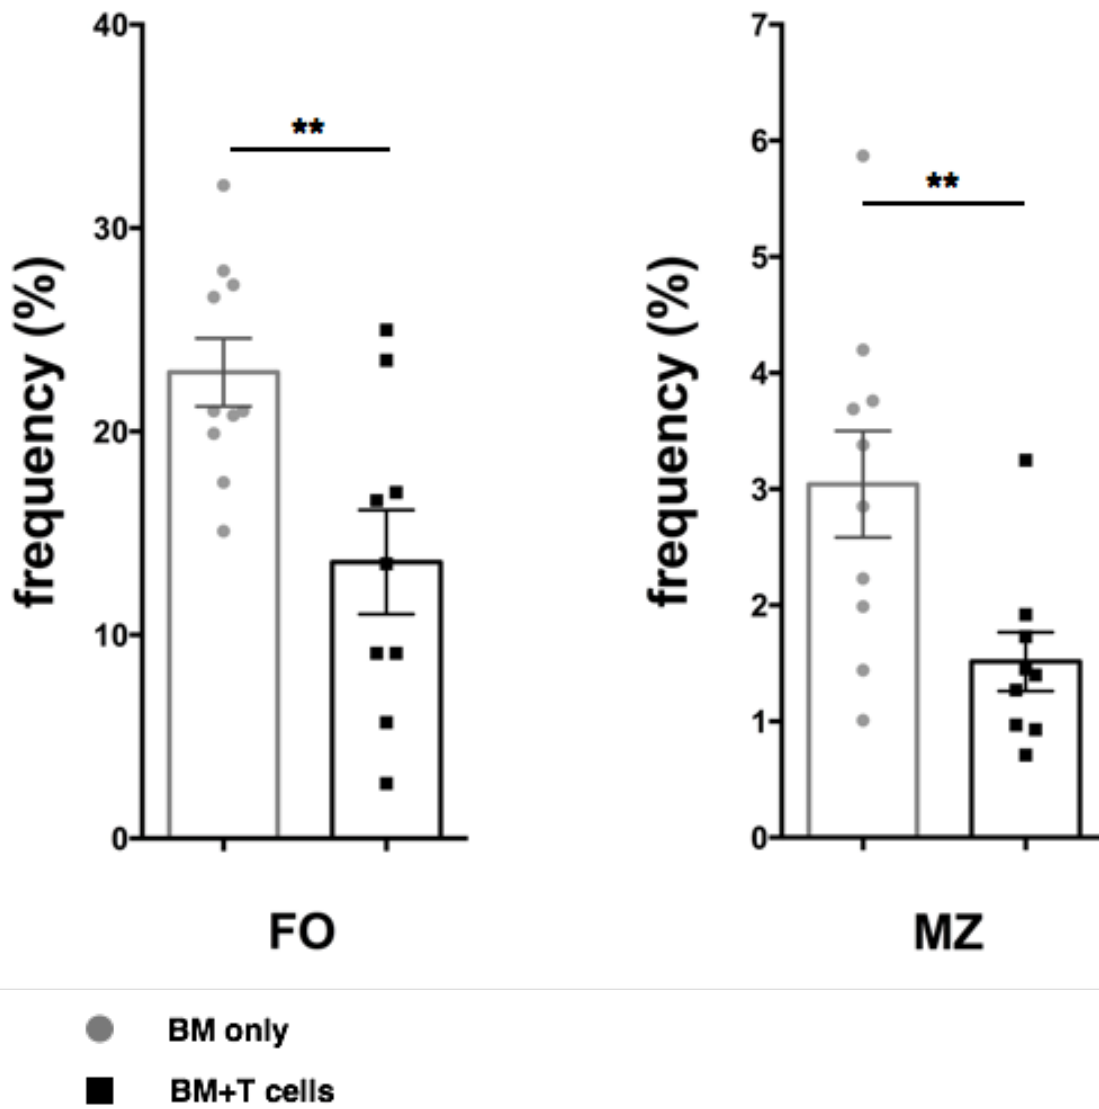

**Figure S1. Reduced frequency of follicular and marginal zone B cells in the spleen of cGVHD animals.** B10.BR mice were transplanted with BM only or BM and T cells from B6 donor mice and spleens were harvested on day 30. Frequency of follicular (FO,  $CD21^{int}IgM^{int}CD23^{+}AA4.1^{-}$ ) and marginal zone (MZ,  $CD21^{hi}IgM^{int}CD23^{-}AA4.1^{-}$ ) of donor origin in spleen of transplanted mice. Combined data from 3 independent experiments, \*\*  $P < 0.01$  (Mann-Whitney test), BM only N=10, BM+T cells N=9)

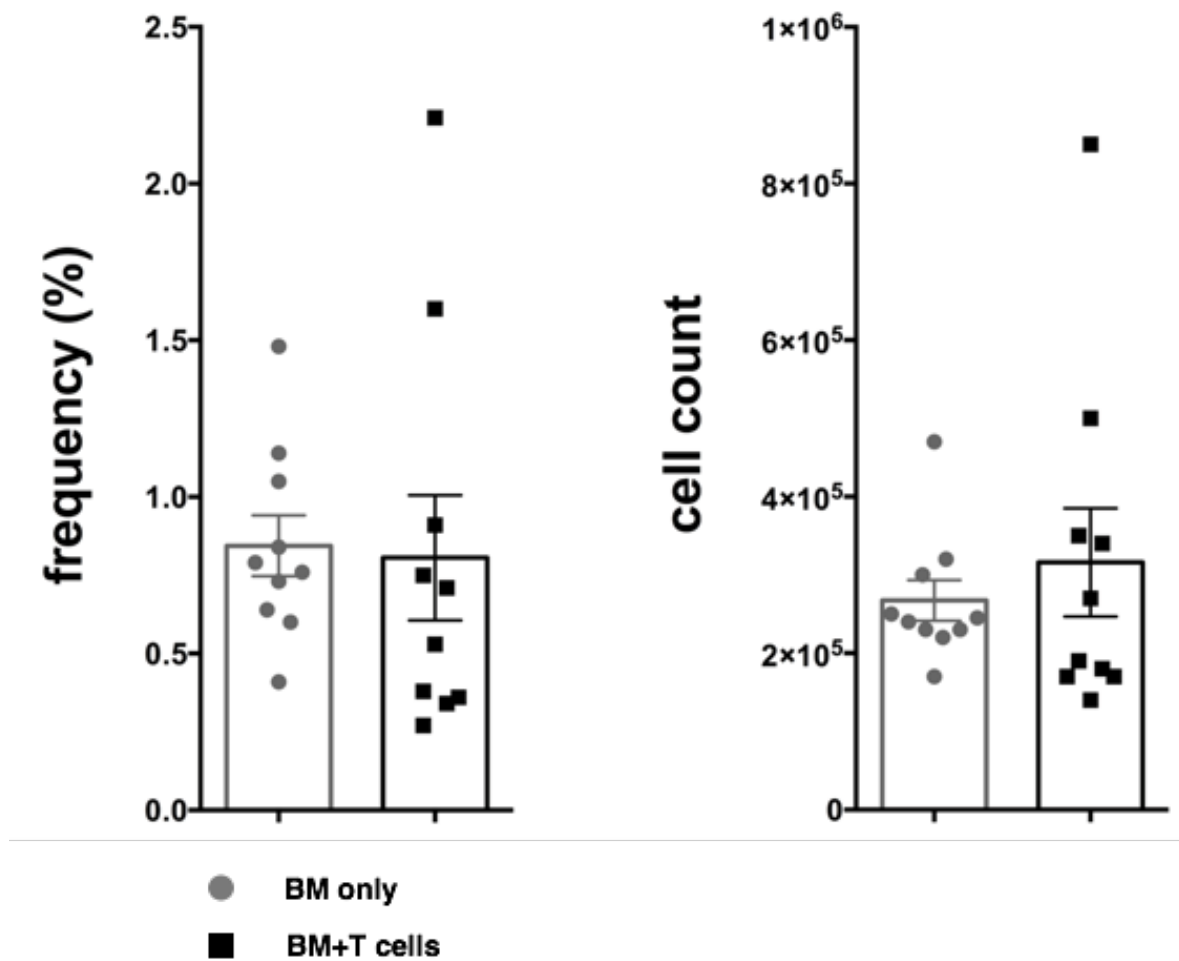

**Figure S2. Hematopoietic stem and progenitor cells (HSPC) are not affected in cGvHD.** B10.BR mice were transplanted with BM only or BM and T cells from B6 donor mice and BM cells from tibiae and femurs were harvested on day 30. Frequency (left) and cell numbers (right) of HSPC (Lin<sup>-</sup>Kit<sup>+</sup>Sca-1<sup>+</sup>Flt3<sup>-</sup>) cells in the BM. Combined data from 3 independent experiments. Mann-Whitney test, N=10 in each group

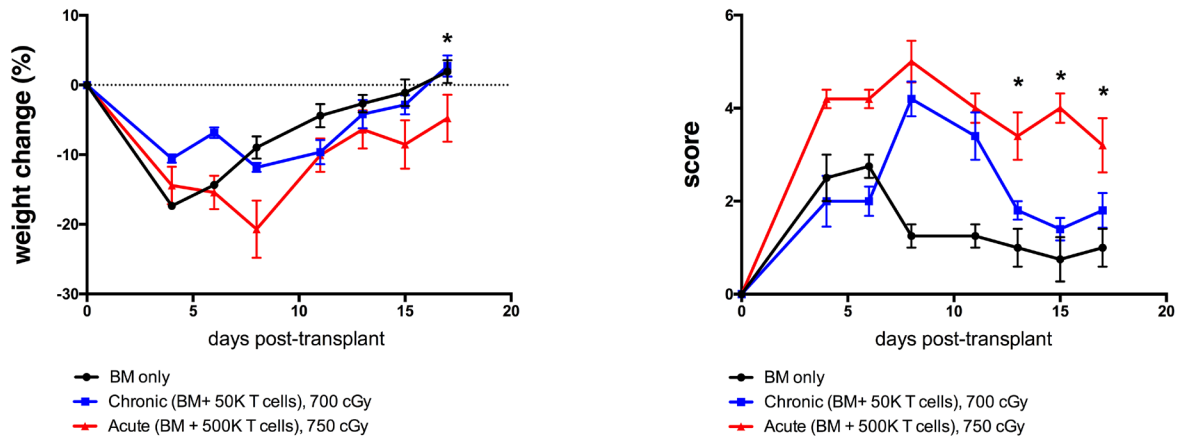

**Figure S3. Comparison of weight change and clinical scores in acute and chronic GvHD mice.** B10.BR mice were transplanted with BM only or BM and low dose ( $5 \times 10^4$ ) or high dose ( $5 \times 10^5$ ) of T cells from B6 donor mice. Mice in aGvHD group also received a higher dose of irradiation (750 cGy vs. 700 cGy)

Weight changes **(A)** and GvHD scores **(B)** of animals were tracked for 17 days after transplantation. Weight change and GvHD scores were compared using multiple t test method with Holm-Sidak correction for multiple comparisons ( $\alpha = 0.05$ , \*  $P < 0.05$ ).

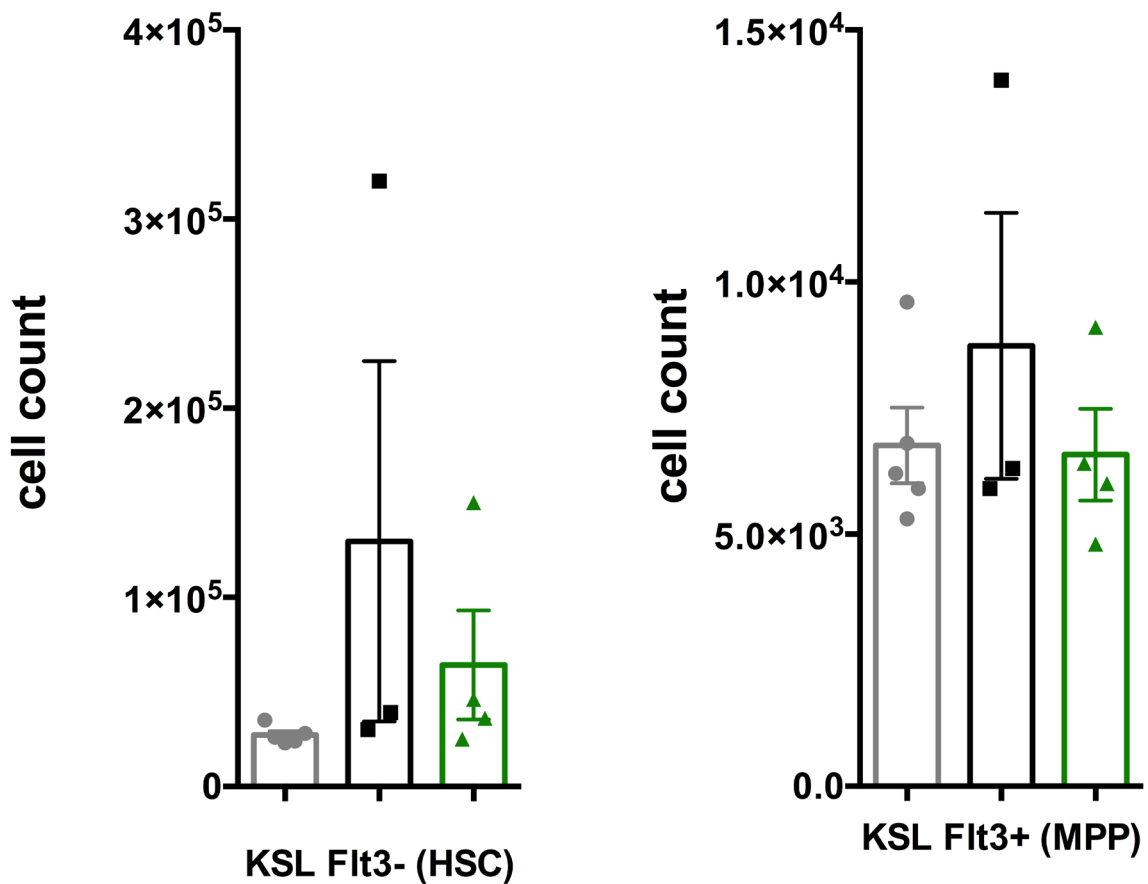

- BM only
- BM+T cells
- △ BM+T cells (+IL-7)

**Figure S4. Injections of mIL-7 does not affect BM HSPC and MPP cells in cGvHD animals.** Overall number of donor-derived HSPC (Lin<sup>-</sup>Kit<sup>+</sup>Sca-1<sup>+</sup>Flt3<sup>-</sup>) and MPP (Lin<sup>-</sup>Kit<sup>+</sup>Sca-1<sup>+</sup>Flt3<sup>+</sup>) isolated from BM of transplanted mice on day 30, BM+T group received either daily injections saline (black bars) or 1 ug/mouse of mIL-7 (green bars) during the first 2 weeks after transplantation, N = 5 for BM only, N=3 for BM+T cells (saline), N=4 for BM+T cells (mIL-7).

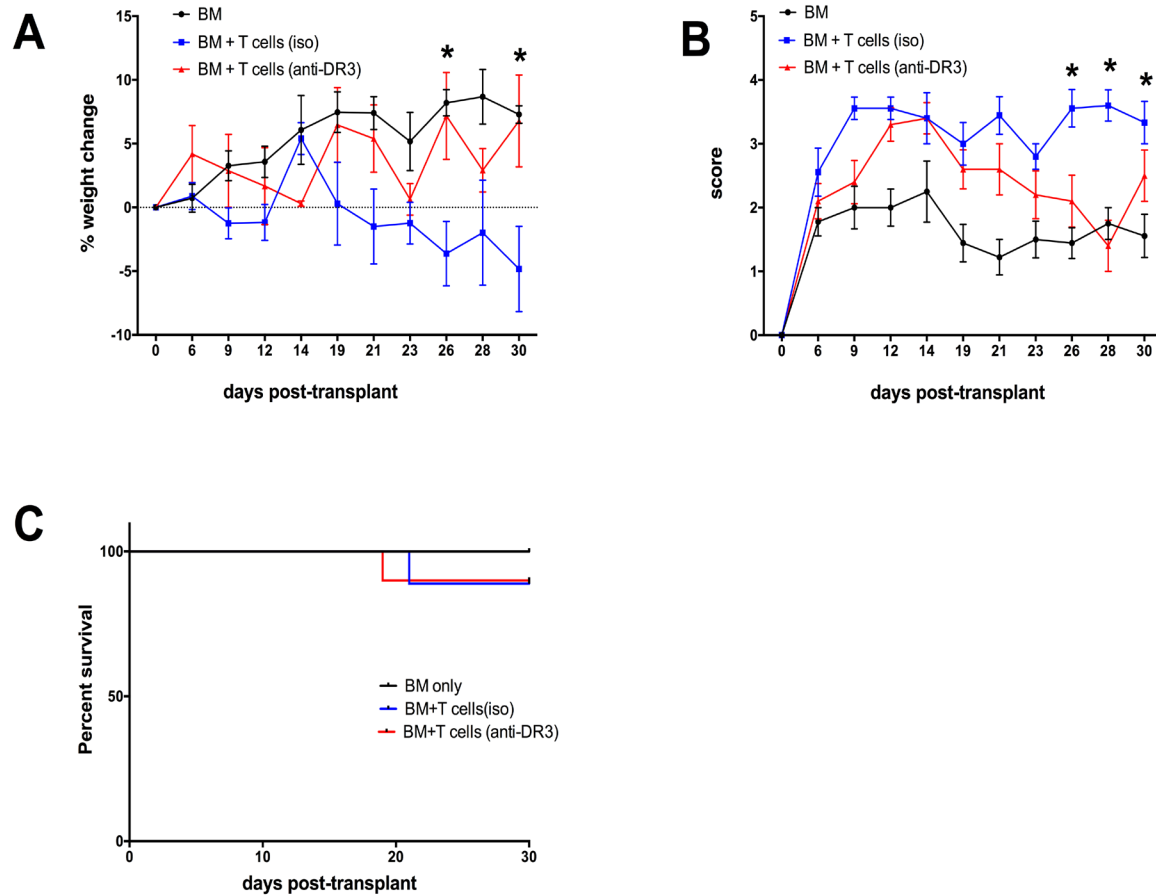

**Figure S5. Infusion of splenic T cells from anti-DR3-treated donors reduces cGvHD severity.** B10.BR mice were transplanted with BM only or BM and T cells from B6 donor mice injected with either anti-DR3 antibody (4C12, 0.5 mg/kg) or hamster isotype control IgG (NTK888) 3 days prior to procedure.

Weights (A), GVHD scores (B) and survival (C) of animals were tracked for 30 days after transplantation. Weight change and GvHD scores were compared using multiple t test method with Holm-Sidak correction for multiple comparisons ( $\alpha = 0.05$ , \*  $P < 0.05$ ). Survival curves were compared using log-rank.

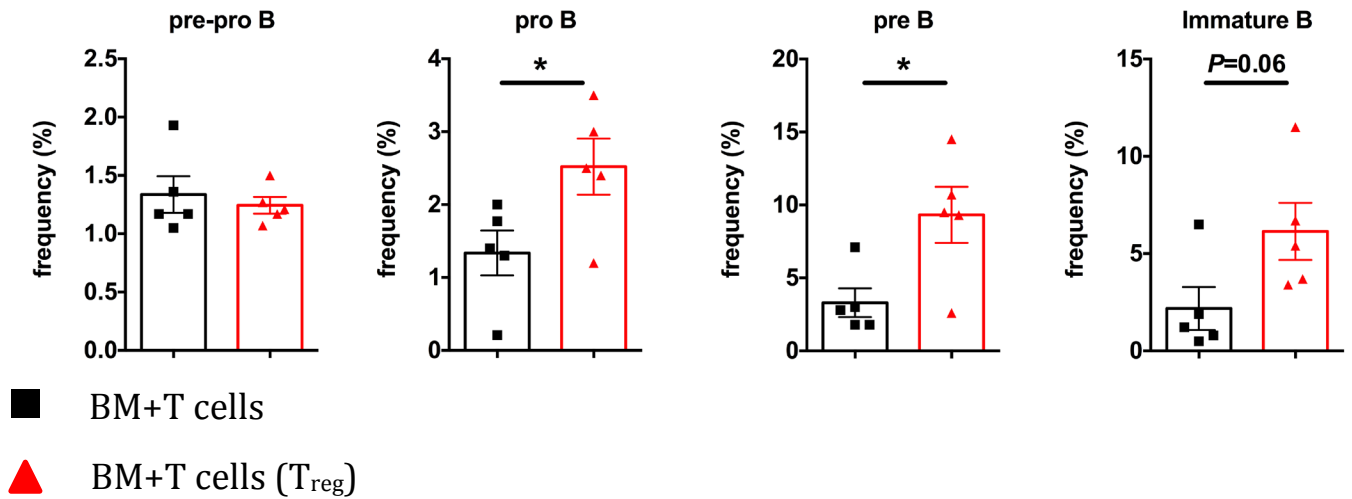

**Figure S6. Prophylactically administered (Day 0) splenic Treg cells reduce cGvHD severity.** B10.BR mice were transplanted with BM and T cells from B6 donor mice with (red triangles) or without (black squares)  $2 \times 10^4$  B6 T<sub>reg</sub>s/recipient. BM cells from tibiae and femurs were harvested on day 30. Unpaired *t*-test, \*  $P < 0.05$ ,  $N = 5$  in each group
